# Supplementary material
Source: PubMed Central journal article supplement (PMC3297475)

## Supplemental Figure S2

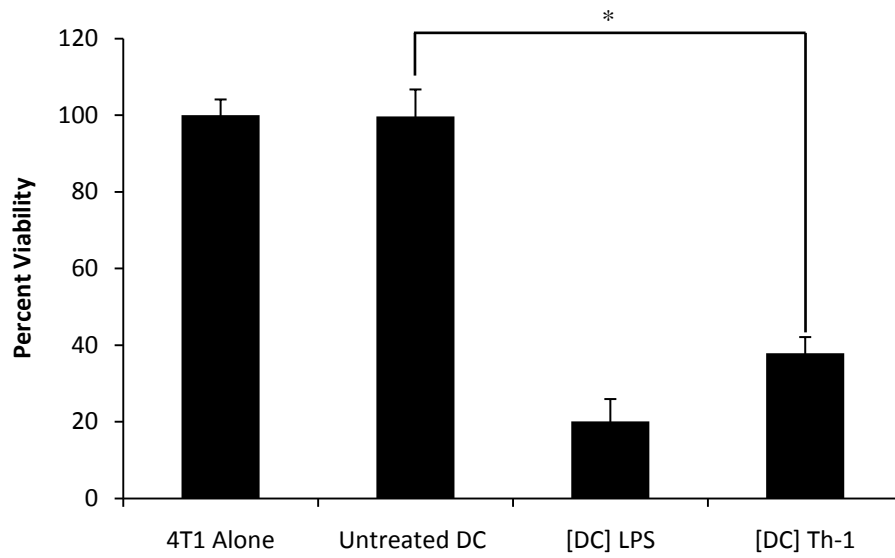

Supplement: NIHMS332197-supplement-2.pdf [file NIHMS332197-supplement-2.pdf]

# Supplemental Figure S3

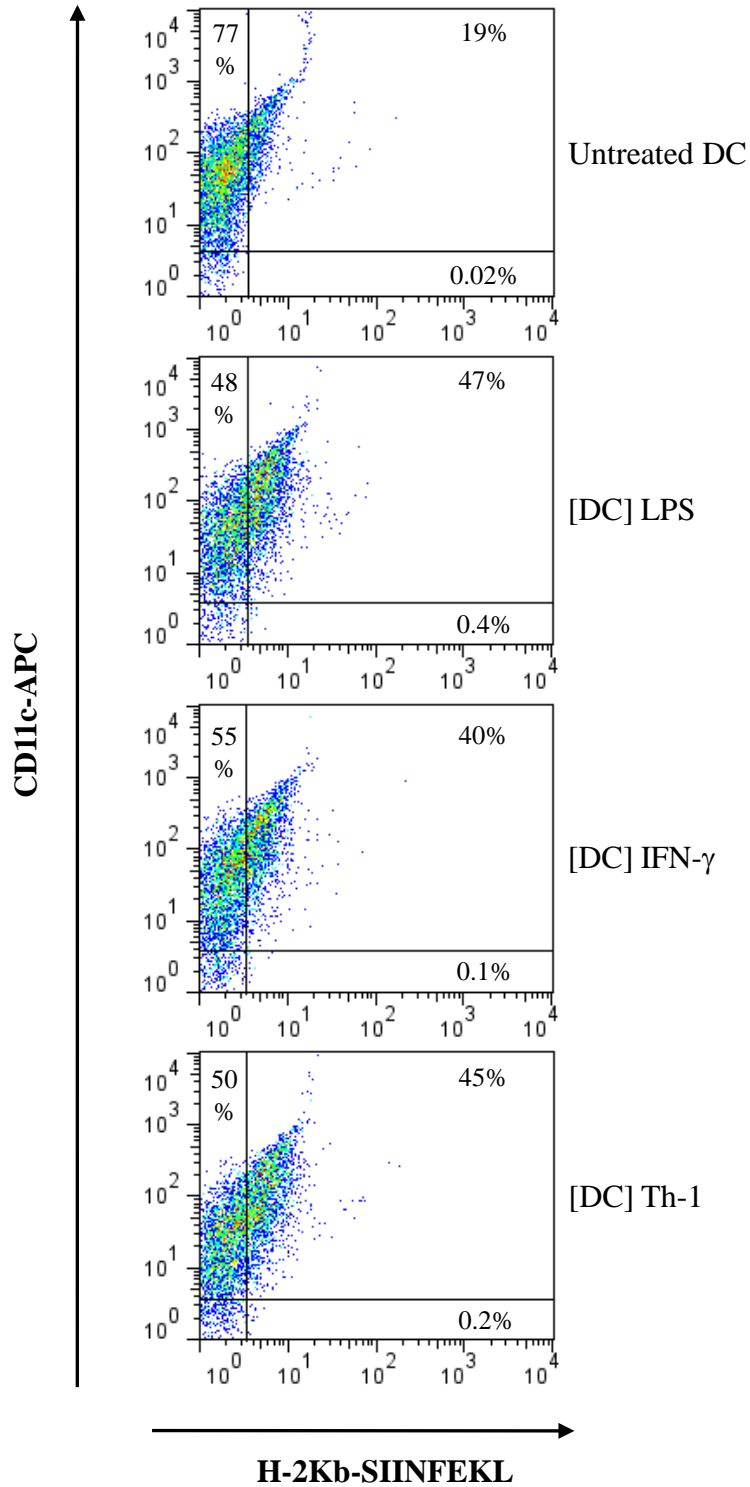

Supplement: NIHMS332197-supplement-3.pdf [file NIHMS332197-supplement-3.pdf]
